# Supplementary material for: Procedures performed during neurosurgery residency in Europe
Source: PubMed Central journal article supplement (PMC7496021; doi:10.1007/s00701-020-04513-4), 2020-08-16
Supplement: 701_2020_4513_MOESM1_ESM.pdf [file 701_2020_4513_MOESM1_ESM.pdf]

**Supplemental Table 1:** Overview on the caseloads of certain types of procedures, performed on average during neurosurgery residency in Europe after excluding survey responses from Turkey. CI = confidence interval.

| <b>Procedure type</b>            | <b>Independent</b>  | <b>Supervised</b>   | <b>Assisted</b>     | <b>Total</b>        |
|----------------------------------|---------------------|---------------------|---------------------|---------------------|
|                                  | <i>Mean, 95% CI</i> | <i>Mean, 95% CI</i> | <i>Mean, 95% CI</i> | <i>Mean, 95% CI</i> |
| All procedures                   | 479, 410 – 548      | 463, 382 – 545      | 573, 433 – 714      | 1500, 1257 – 1743   |
| Cranial procedures               | 251, 216 – 286      | 246, 209 – 282      | 300, 232 – 368      | 796, 684 – 909      |
| Spinal procedures                | 193, 153 – 232      | 211, 150 – 272      | 270, 190 – 351      | 673, 514 – 832      |
| Procedures on adult patients     | 428, 364 – 492      | 419, 346 – 492      | 525, 394 – 656      | 1369, 1147 – 1590   |
| Procedures on pediatric patients | 31, 22 – 40         | 79, 3 – 155         | 59, 30 – 88         | 172, 80 – 264       |
