# Supplementary material for: Procedures performed during neurosurgery residency in Europe
Source: PubMed Central journal article supplement (PMC7496021; doi:10.1007/s00701-020-04513-4), 2020-08-16
Supplement: 701_2020_4513_MOESM3_ESM.pdf [file 701_2020_4513_MOESM3_ESM.pdf]

**Supplemental Table 3:** Basic demographic information of the survey responders, comparing the preliminary (n=80) and the new cohort. SD = standard deviation.

| Variable                     | Preliminary cohort | New cohort     | p-value |
|------------------------------|--------------------|----------------|---------|
| Age in years (mean $\pm$ SD) | 43.0 $\pm$ 8.6     | 42.4 $\pm$ 9.1 | 0.657   |
| Gender                       |                    |                |         |
| Male                         | 71 (88.8%)         | 77 (87.5%)     | 0.803   |
| Female                       | 9 (11.2%)          | 11 (12.5%)     |         |
| Type of hospital/employment  |                    |                |         |
| University/teaching hospital | 73 (91.3%)         | 70 (79.6%)     | 0.065   |
| Other public hospital        | 5 (6.2%)           | 16 (18.2%)     |         |
| Private hospital             | 2 (2.5%)           | 2 (2.3%)       |         |
| Country of training          |                    |                |         |
| Albania                      | - (0%)             | 1 (1.1%)       | <0.001  |
| Austria                      | 2 (2.5%)           | - (0%)         |         |
| Belgium                      | 2 (2.5%)           | - (0%)         |         |
| Bosnia and Herzegovina       | - (0%)             | 1 (1.1%)       |         |
| Croatia                      | - (0%)             | 1 (1.1%)       |         |
| Czech Republic               | - (0%)             | 1 (1.1%)       |         |
| Estonia                      | 1 (1.3%)           | - (0%)         |         |
| Finland                      | 4 (5.0%)           | 4 (4.6%)       |         |
| France                       | 16 (20.0%)         | 5 (5.7%)       |         |
| Germany                      | 12 (15.0%)         | 25 (28.4%)     |         |
| Greece                       | 1 (1.3%)           | 11 (12.5%)     |         |
| Israel                       | 1 (1.3%)           | 1 (1.1%)       |         |
| Italy                        | 1 (1.3%)           | 7 (8.0%)       |         |
| Kazakhstan                   | 1 (1.3%)           | 2 (2.3%)       |         |
| Lithuania                    | 1 (1.3%)           | - (0%)         |         |
| Netherlands                  | - (0%)             | 4 (4.6%)       |         |
| Norway                       | 7 (8.8%)           | - (0%)         |         |
| Poland                       | - (0%)             | 1 (1.1%)       |         |
| Portugal                     | - (0%)             | 4 (4.6%)       |         |
| Romania                      | - (0%)             | 1 (1.1%)       |         |
| Russian Federation           | - (0%)             | 2 (2.3%)       |         |
| Serbia                       | 7 (8.8%)           | 2 (2.3%)       |         |
| Sweden                       | 4 (5.0%)           | 1 (1.1%)       |         |
| Switzerland                  | 9 (11.3%)          | 4 (4.6%)       |         |
| Turkey                       | - (0%)             | 4 (4.6%)       |         |

|                                         |                    |                    |       |
|-----------------------------------------|--------------------|--------------------|-------|
| United Kingdom                          | 11 (13.8%)         | 3 (3.4%)           |       |
| Length of residency (mean ± SD)         | 6.0 ± 1.0          | 5.8 ± 0.9          | 0.148 |
| Year of residency graduation            |                    |                    |       |
| 1976 – 1980                             | 1 (1.3%)           | 1 (1.1%)           |       |
| 1981 – 1985                             | - (0%)             | 1 (1.1%)           |       |
| 1986 – 1990                             | 2 (2.5%)           | 3 (3.4%)           |       |
| 1991 – 1995                             | 5 (6.3%)           | 6 (6.8%)           |       |
| 1996 – 2000                             | 6 (7.5%)           | 3 (3.4%)           | 0.946 |
| 2001 – 2005                             | 8 (10.0%)          | 7 (8.0%)           |       |
| 2006 – 2010                             | 12 (15.0%)         | 16 (18.2%)         |       |
| 2011 – 2015                             | 20 (25.0%)         | 22 (25.0%)         |       |
| 2016 – 2019                             | 26 (32.5%)         | 29 (33.0%)         |       |
| Part of training in a different country |                    |                    |       |
| No                                      | 62 (77.5%)         | 60 (68.2%)         | 0.176 |
| Yes                                     | 18 (22.5%)         | 28 (31.8%)         |       |
| <b>Total</b>                            | <b>n=80 (100%)</b> | <b>n=88 (100%)</b> |       |
